# Supplementary material
Source: Research Square preprint supplement (doi:10.21203/rs.3.rs-9269552/v1)
Supplement: Supplementary file 1 [file cffad5fd9287736dfe631bd7.docx]

## **Extended Data**

### **Table S1: Tabulated Amino Acid Transduction Efficiency (*η*)**

| Amino Acid (Symbol) | π-Density (HOMO) | Ionization Potential (eV) | Reorg. Energy (λ, eV) | Coupling Matrix (Vab​, meV) | Efficiency (η) | Functional Role in QCT |
| --- | --- | --- | --- | --- | --- | --- |
| Tryptophan (Trp) | 0.96 | 7.2 | 0.12 | 25.0 | 0.94 | Primary ASC Scout/ QS/ Lead Transducer |
| Tyrosine (Tyr) | 0.89 | 8.1 | 0.15 | 22.5 | 0.88 | Secondary ASC Scout / QS/ PCET |
| Phenylalanine (Phe) | 0.82 | 8.7 | 0.18 | 18.2 | 0.76 | Tunneling Bridge (e waveguide) |
| Histidine (His) | 0.65 | 8.9 | 0.22 | 14.0 | 0.45 | pH-Sensitive Gate |
| Cysteine (Cys) | 0.35 | 9.2 | 0.38 | 8.5 | 0.22 | Red-Ox Regulator |
| Methionine (Met) | 0.28 | 9.4 | 0.42 | 6.2 | 0.15 | Sulfur-Linker |
| Arginine (Arg) | 0.05 | 10.5 | 0.65 | 1.2 | 0.08 | Classical Storage ( ) |
| Lysine (Lys) | 0.04 | 10.8 | 0.68 | 0.9 | 0.06 | Classical Anchor |
| Glutamate (Glu) | 0.08 | 11.2 | 0.75 | 0.5 | 0.05 | Decoherence Sink |
| Aspartate (Asp) | 0.07 | 11.4 | 0.78 | 0.4 | 0.04 | Decoherence Sink |
| Glutamine (Gln) | 0.05 | 11.6 | 0.72 | 0.6 | 0.04 | Polar Stabilizer |
| Asparagine (Asn) | 0.05 | 11.8 | 0.74 | 0.5 | 0.03 | Polar Stabilizer |
| Serine (Ser) | 0.03 | 12.1 | 0.82 | 0.2 | 0.02 | Protonic Wire |
| Threonine (Thr) | 0.03 | 12.0 | 0.80 | 0.2 | 0.02 | Protonic Wire |
| Leucine (Leu) | 0.01 | 12.5 | 0.95 | 0.1 | 0.01 | Insulating Plug |
| Isoleucine (Ile) | 0.01 | 12.6 | 0.96 | 0.1 | 0.01 | Insulating Plug |
| Valine (Val) | 0.01 | 12.8 | 0.98 | 0.1 | 0.01 | Insulating Plug |
| Alanine (Ala) | 0.01 | 13.1 | 1.10 | 0.0 | <0.01 | Structural Void |
| Glycine (Gly) | 0.00 | 13.5 | 1.25 | 0.0 | <0.01 | Structural Void |
| Proline (Pro) | 0.02 | 11.5 | 0.85 | 0.3 | 0.02 | Helix Breaker |

**Analytical Commentary:**

1. **Aromatic-Transition Coherence**: The efficiency ( ) for Trp, Tyr, and Phe remains because their reorganization energy ( ) is significantly lower than the threshold of the Born-Oppenheimer breakdown. This allows the electronic search to proceed without interference from the 1836-fold heavier nuclei. The high -density and low Ionization Potential of Trp and Tyr are mathematically essential for maintaining the Electronic Search (QS) phase across the nm barrier.
2. **The 89.1% Quantum Limit**: This value is an average of the optimized Trp-Tyr Aromatic Search Channel (ASC) scaffold. The table shows that moving away from these residues causes a catastrophic drop in (e.g., Leucine at ), essentially collapsing the quantum state into a classical insulator.
3. **The Dielectric Dead-Zone (Decoherence sink)**: Aliphatic and acidic residues (e.g., Glu, Leu) exhibit a reorganization energy . Physically, this indicates that any electronic search attempt would be immediately dissipated as vibrational phonons, making these residues ideal for the Classical Storage (CS) phase but unsuitable for high-frequency transduction.
4. **VSD Conservation**: This table provides the physical justification for why Tryptophan is the conserved hydrophobic plug in voltage sensors; it is the only residue with a predicted efficiency of , providing the necessary fidelity for the Quantum-to-Classical Transducer.
5. **The Arginine Anomaly**: Despite having very low efficiency (), Arginine is the most critical residue for the Classical Storage () phase. Its high Reorganization Energy ( eV) is precisely what allows it to act as the massive anchor that rectifies the electronic search into mechanical work.

**Table S2: Atomic Coordinates and Transduction Parameters for the Aromatic Search Channel (ASC)**

The following coordinates define the spatial orientation of the key -scaffold residues within the **Voltage-Sensor Domain (VSD)** hydrophobic plug. These residues form the physical substrate for the electronic **Quantum Search (QS)** phase described in Figure 4.

| Residue | ID | Chain | X (Å) | Y (Å) | Z (Å) | π-Density (ψQS​) | η (Efficiency) |
| --- | --- | --- | --- | --- | --- | --- | --- |
| Tryptophan | Trp-501 | A | 14.282 | -8.114 | 22.401 | 0.96 | 0.94 |
| Tyrosine | Tyr-493 | A | 12.105 | -5.442 | 18.119 | 0.89 | 0.88 |
| Tryptophan | Trp-485 | A | 15.394 | -2.991 | 14.552 | 0.95 | 0.94 |
| Tyrosine | Tyr-479 | A | 13.881 | 0.124 | 10.228 | 0.88 | 0.88 |
| Arginine* | Arg-R1 | B | 18.442 | -6.221 | 20.115 | 0.04 | 0.12 (Classical) |

**Note:** *Arginine (R1) serves as the primary gating charge ( ) that receives the rectified mechanical force from the 1836:1 mass-anisotropy filter.

These values confirm that the inter-residue distance within the ASC is maintained at approximately 4.5–6.0 Å, which is the optimal tunneling distance for sustaining the non-adiabatic electronic search before the decoherence-triggered snap into the protonic position.
